# Supplementary material for: Sodium butyrate improves renal injury in diabetic nephropathy through AMPK/SIRT1/PGC-1α signaling pathway
Source: PubMed Central journal article supplement — Sci Rep. 2024 Aug 1;14:17867. doi: 10.1038/s41598-024-68227-8 (PMC11294604; doi:10.1038/s41598-024-68227-8), 2024-08-01

## Full unedited gel for Figure 4A

1. We appreciate the inclusion of original images with the manuscript. We note that some of the original unprocessed images provided do not seem to correspond to the cropped images shown in the figures. Please ensure that the correct original data is shown.

Response 1: We make sure the original unprocessed images provided correspond to the cropped images shown in the figures. The following figure 1 corresponds to the second band in Figure 4A of the manuscript; The following figure 2 corresponds to the first band in Figure 4A of the manuscript; The following figure 3 corresponds to the sixth band in Figure 4A of the manuscript; The following figure 4 corresponds to the fifth band in Figure 4A of the manuscript; The following figure 5 corresponds to the fourth band in Figure 4A of the manuscript; The following figure 5 corresponds to the third and seventh band in Figure 4A of the manuscript.

2. The uncropped images should indicate where they were cropped and be labelled as in the main text.

Response 2: The blots were cut prior to hybridisation with antibodies, and the 40-70KDa band was divided into two parts: approximately 40-50KDa and 50-70KDa.

3. Please ensure that the original images are clearly labelled so that they can be easily matched to the cropped versions in the manuscript figures.

Response 3: we make sure that the original images are clearly labelled so that they can be easily matched to the cropped versions in the manuscript figures.

4. Please label each lane with the name of the sample in that lane.

Response 4: The name of the sample in each lane has been marked: the first lane represents the NC group, the second lane represents the DN group, the third and fourth lane represent the NaB1 group, the fifth and sixth lane represent the NaB2 group.

5. Please label the standard protein size markers with the expected molecular weight.

Response 5: The molecular weight of the target proteins and markers have been labeled in the following figures 1-6:  $\beta$ -actin(42KDa), AMPK(62KDa), p-AMPK(62KDa), NF-kB(65KDa), p-NF-kB(65KDa), GLP-1R(53KDa), NOX4(67KDa).

6. Please ensure it is clear what proteins are presented on each gel.

Response 6: The name of the protein presented on each gel has been marked. There are two types of proteins in figure 1: AMPK and  $\beta$ -actin; there are two types of proteins in figure 2: p-AMPK and  $\beta$ -actin; There are two types of proteins in figure 3: GLP-1R and  $\beta$ -actin; There are two types of proteins in figure 4: NOX4 and  $\beta$ -actin; There are two types of proteins in figure 5: NF-KB and  $\beta$ -actin; There are two types of proteins in figure 6: p-NF-KB and  $\beta$ -actin.

7. Please provide high-resolution images of all gels and blots. All digitised images submitted with the final revision of the manuscript should be 300 DPI if possible.

Response 7: All digitised images submitted with the final revision of the manuscript were 600DPI. The original image can be found in the attachment.

**1.** The membrane was cut into AMPK and  $\beta$ -actin at 47KDa

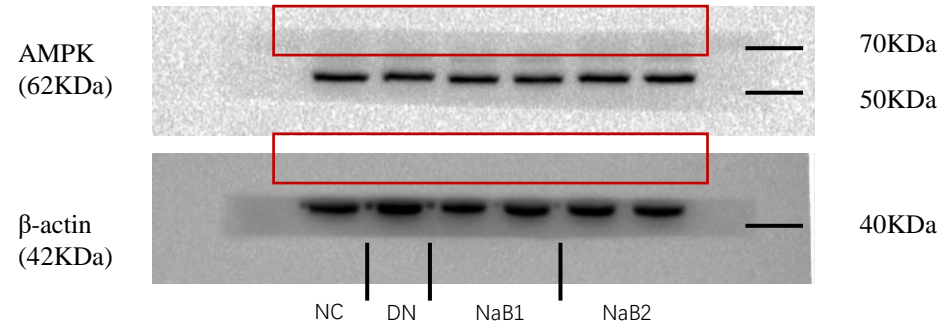

**2.** The membrane was cut into p-AMPK and  $\beta$ -actin at 47KDa

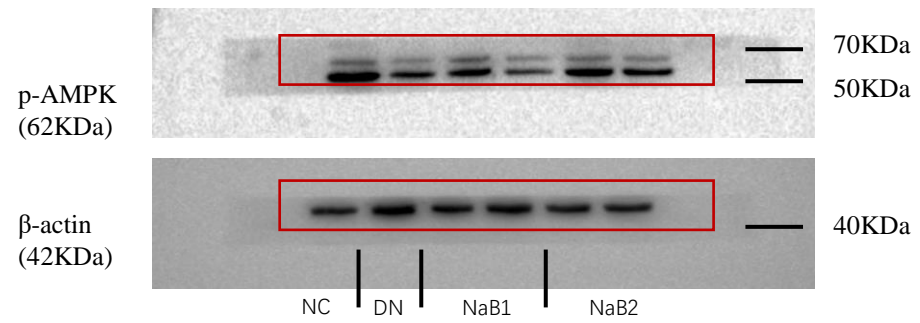

**3.** The membrane was cut into GLP-1R and  $\beta$ -actin at 50KDa

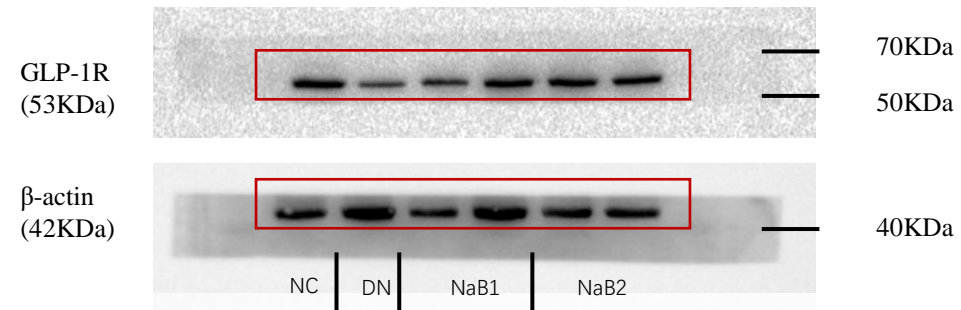

**4.** The membrane was cut into NOX4 and  $\beta$ -actin at 45KDa

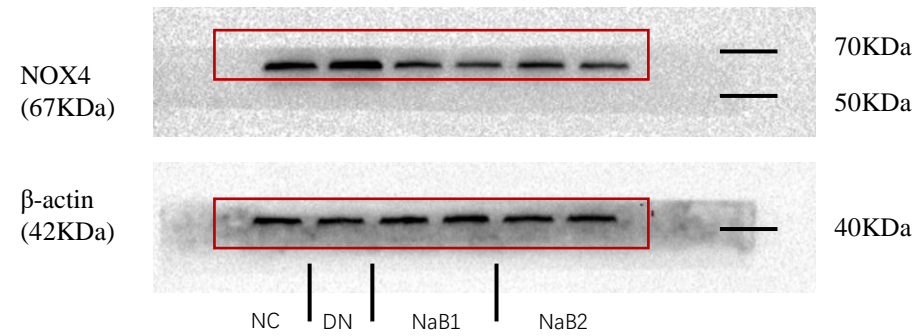

**5.** The membrane was cut into NF- $\kappa$ B and  $\beta$ -actin at 47KDa

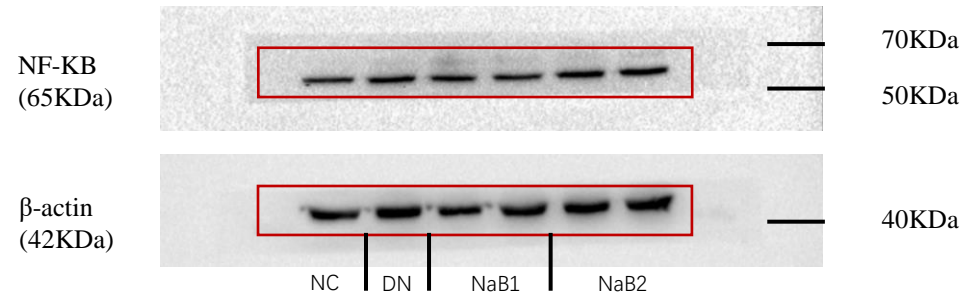

**6.** The membrane was cut into p-NF- $\kappa$ B and  $\beta$ -actin at 47KDa

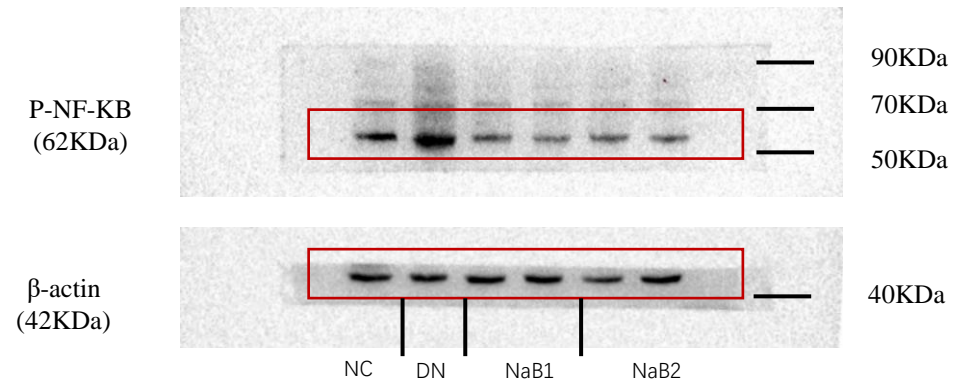

Supplement: 41598_2024_68227_MOESM5_ESM.pdf [file 41598_2024_68227_MOESM5_ESM.pdf]
