# Supplementary material for: Sodium butyrate improves renal injury in diabetic nephropathy through AMPK/SIRT1/PGC-1α signaling pathway
Source: PubMed Central journal article supplement — Sci Rep. 2024 Aug 1;14:17867. doi: 10.1038/s41598-024-68227-8 (PMC11294604; doi:10.1038/s41598-024-68227-8), 2024-08-01
Supplement: 41598_2024_68227_MOESM4_ESM.pdf [file 41598_2024_68227_MOESM4_ESM.pdf]

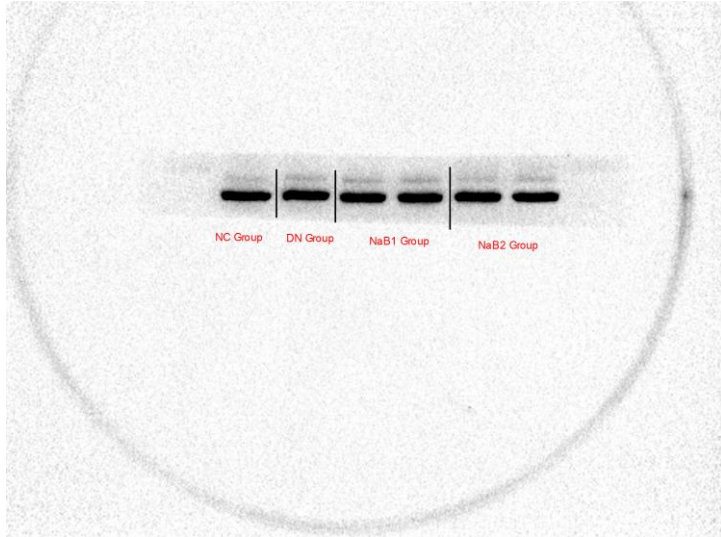

grouping and Annotation

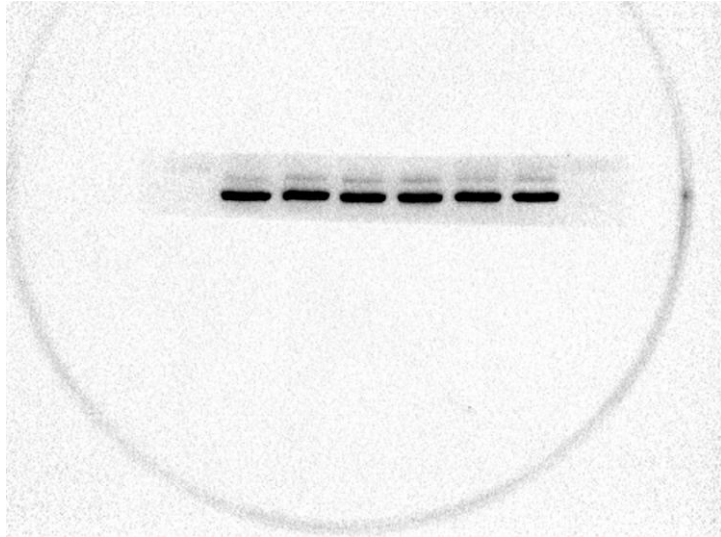

AMPK

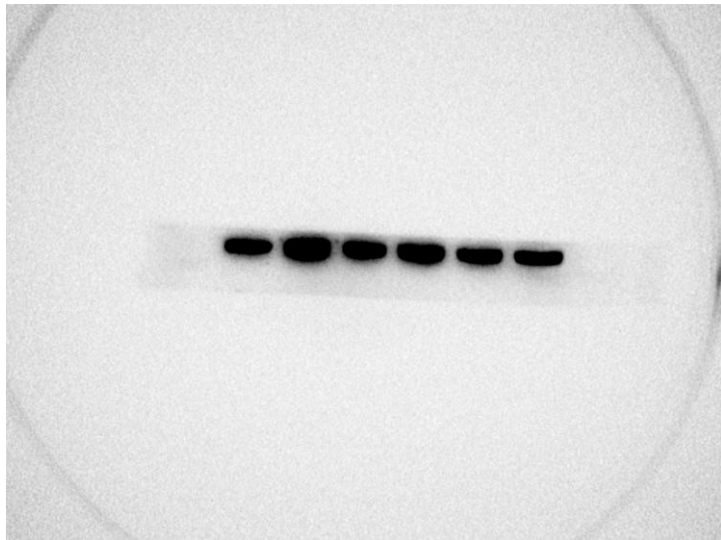

Same PDVEF film,  $\beta$ -actin

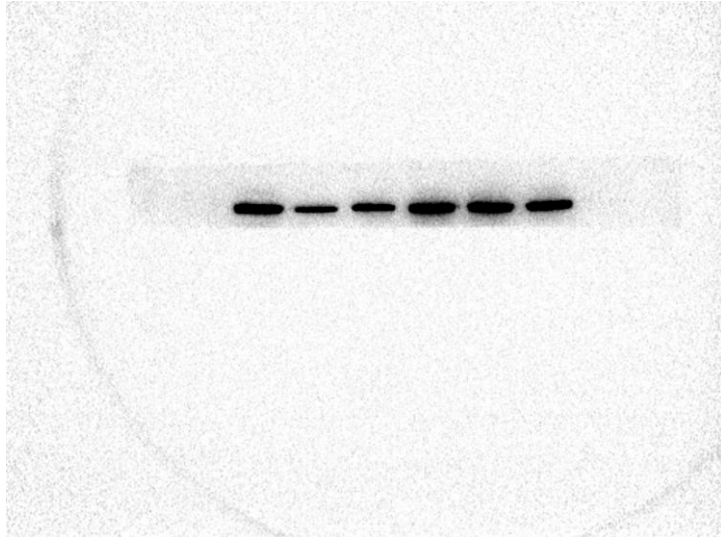

GLP-1R

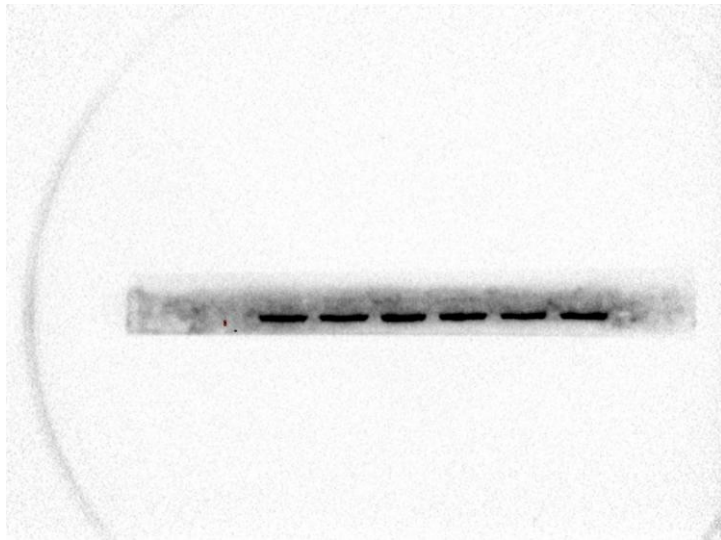

$\beta$ -actin, using the same film

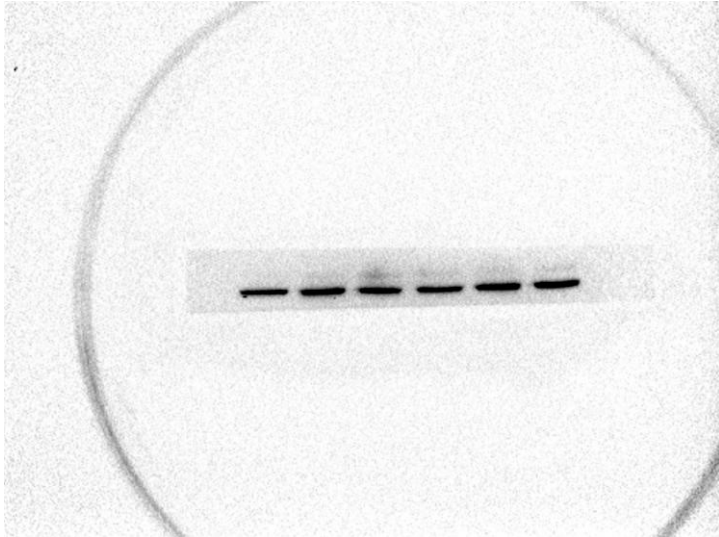

NF-KB

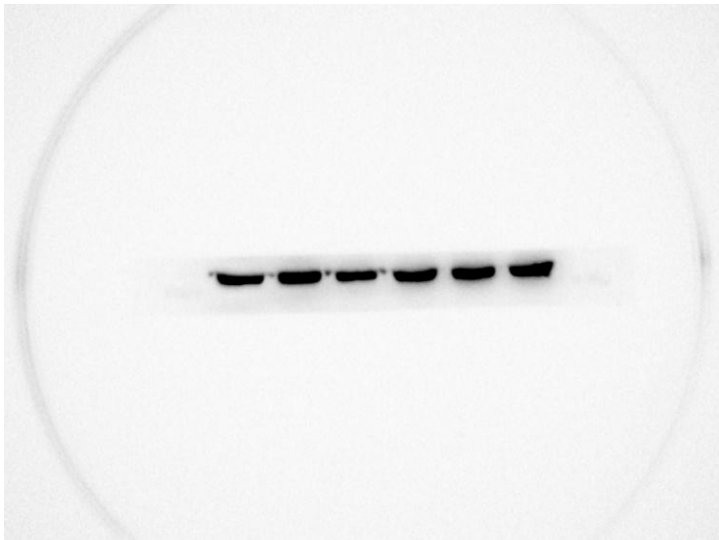

$\beta$  -actin,the same film

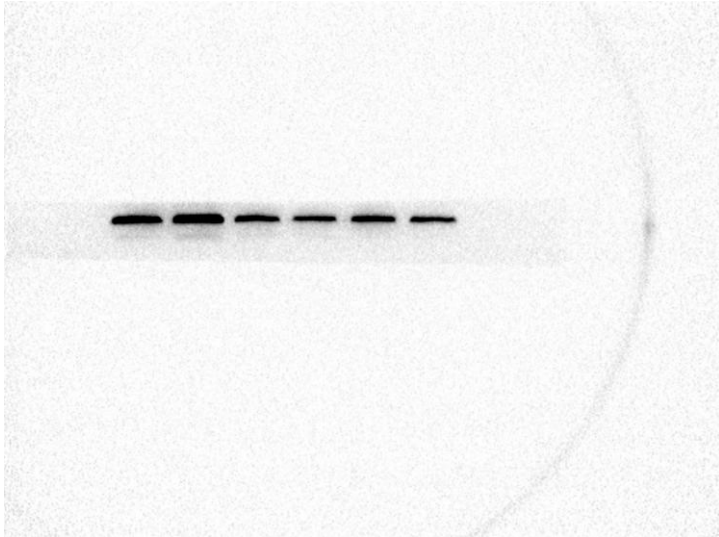

nxo4

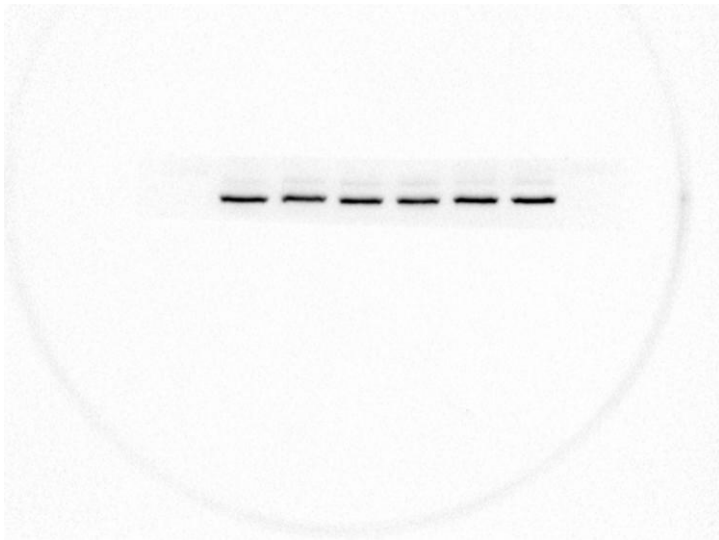

AMPK

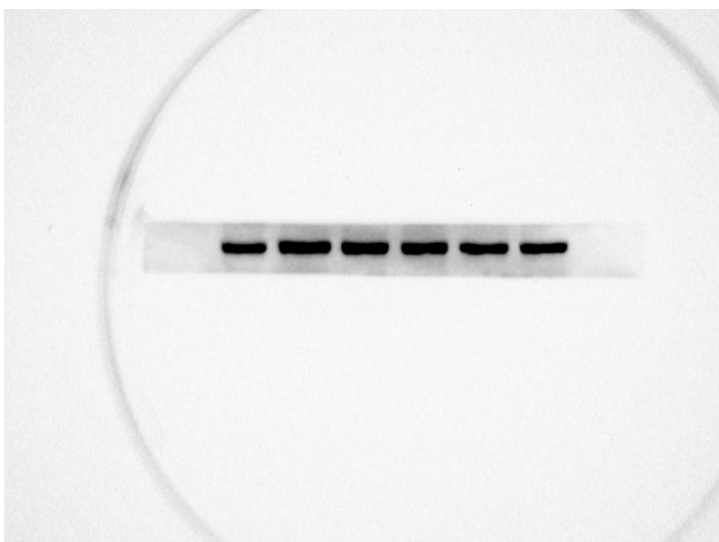

$\beta$  -actin,the same film

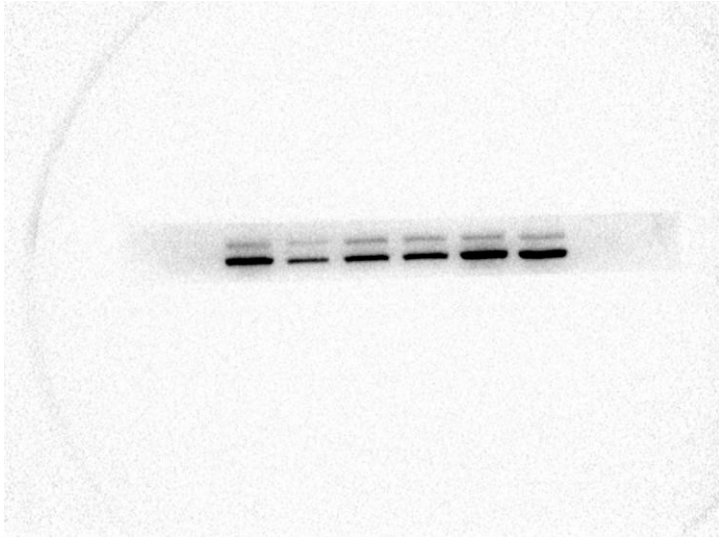

p-ampk

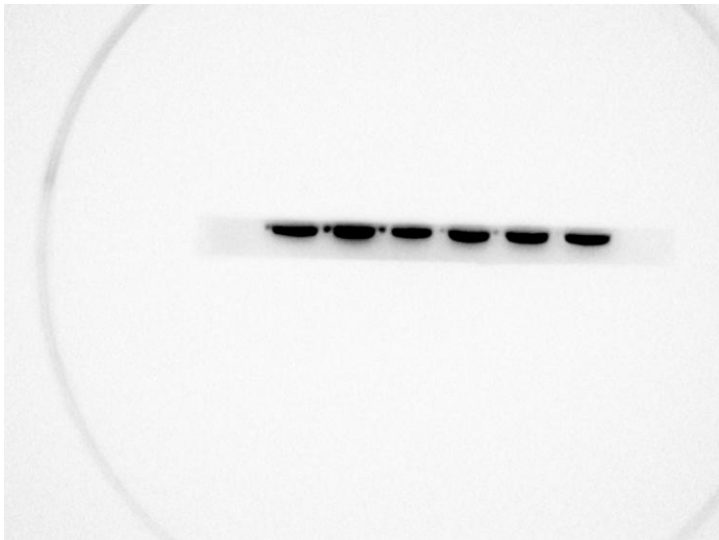

the same PVDF film,  $\beta$  -actin

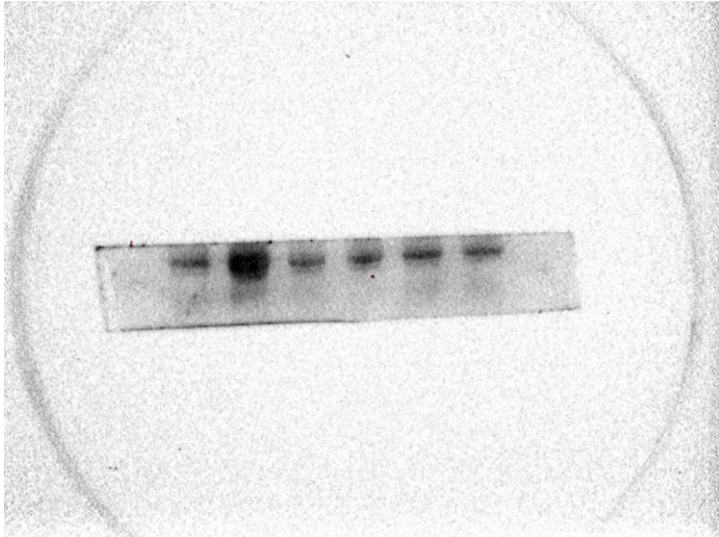

P-NF-KB

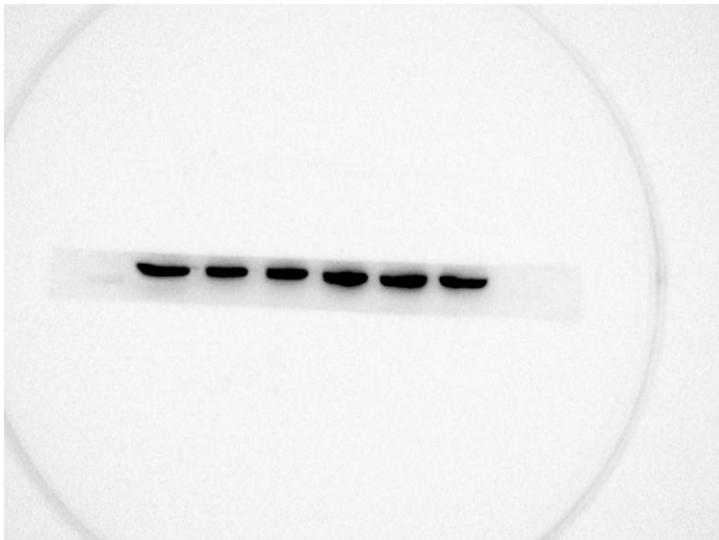

$\beta$  -actin, the same film used
